# Supplementary material
Source: PubMed Central journal article supplement (PMC3094187)
Supplement: supp_00966.2010_legends.pdf [file supp_00966.2010_legends.pdf]

1 **Supporting material**

2 **Supporting Figure 1. VIP added to the medium halved in concentration after 2 hours.** The  
3 percentage (black line) and concentration (grey line) of the remaining VIP in the culture medium  
4 was measured using ELISA. After 2 hours, about half of the VIP remained and only 20 % of VIP  
5 remained after 1 day.

6

7 **Supporting Figure 2. VIP treatment during the late subjective night induced transient**

8 **shifts of PER2::*LUC* rhythms.** (A) Representative actogram of PER2::*LUC* expression shows  
9 that on the day after VIP application, the SCN rhythm was advanced by several hours (\*) and on  
10 subsequent days established a smaller steady-state phase shift (black line). (B) Transient phase  
11 shifts were significantly larger than steady-state shifts following VIP application around CT 20  
12 (mean  $\pm$  SEM;  $p < 0.05$ , One-way ANOVA,  $F_{1,16} = 6.17$ ), but not at other times.

13

14 **Supporting Figure 3. VIP pulses rapidly changed the phase, but not the period of SCN**

15 **cultures.** The period before and after 10  $\mu$ M VIP treatment differed by less than 1 hour in most  
16 SCN cultures (n=116 of 126). This is further evidence that VIP can entrain the SCN through  
17 rapid shifts in the circadian oscillator.

18
